# Supplementary material
Source: PubMed Central journal article supplement (PMC3476536)
Supplement: supp_blood-2012-05-430876_blood-2012-05-430876-1.pdf [file supp_blood-2012-05-430876_blood-2012-05-430876-1.pdf]

## SUPPLEMENTARY MATERIALS

### Supplemental Figure Legends

**Supplemental Figure 1. *SF3B1* is frequently mutated in patients with RARS and RARS-T.** We performed Sanger sequencing on exons 13, 14, 15, and 16 of *SF3B1* in 456 patients. Patients are divided in 4 groups: (A) MDS (n=93), (B) MDS/MPN (n=105), (C) AML (n=94), and (D) Others (n=164). Bar histograms show the frequency of *SF3B1* mutations. White bars and black bars indicate wild type and mutant patients, respectively. The frequency of *SF3B1* mutations is higher in patients with RARS (68%) and RARS-T (81%) compared to the other groups. (E) Schematic distribution of *SF3B1* mutations in different diseases according to 2008 World Health Organization criteria. Each color represents a specific mutation.

MDS, myelodysplastic syndromes; MPN, myeloproliferative neoplasms; AML, acute myeloid leukemia.

**Supplemental Figure 2. Human Colony Forming-Units Cell Assay.** Human clonogenic progenitor cells with and without different doses of meayamycin (2, 10, 50nM) were analyzed for the presence of ring sideroblasts (RS) after 2 weeks of culture. Bar histogram represents the percentage of RS calculated by scoring 200 erythroid cells per concentration of meayamycin in representative experiment.

**Supplemental Figure 3. *SF3B1* mutations predicts for better overall survival.** Overall survival calculated by univariate analysis at time of sampling is presented for (A) MDS, (B) MDS/MPN, and (C) RARS/RARS-T groups. Blue and

magenta lines represent wild type (WT) and mutant patients, respectively.  $P \leq .05$  is considered statistically significant.

**Supplemental Table 1. List of genes showing differential gene expression between *SF3B1* mutant and normal samples.** Differential gene expression was tested on 12,870 reference genes for differential expression. One hundred thirty genes were found to be differentially expressed using a False Discovery Rate (FDR) level of 0.05. Ninety-four % of these genes were under-expressed in *SF3B1* mutant compared to normal samples.

**Supplemental Table 2. List of gene sets showing over and under representation of differential gene expression.** MSigDB database version 3.0 (<http://www.broadinstitute.org/gsea/msigdb/index.jsp>) was used to define gene set collections (c2-c5) of under and over represented genes. Adjusted  $P < 0.05$  is considered significant for each gene set.

**A****MDS**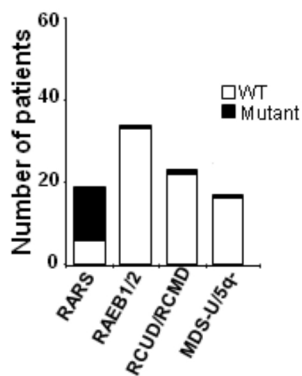**B****MDS/MPN**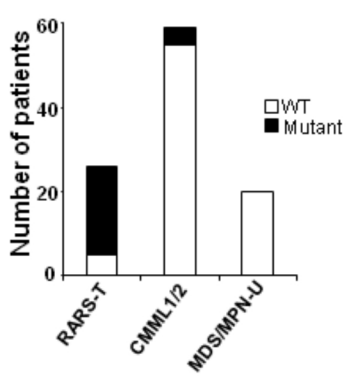**C****AML**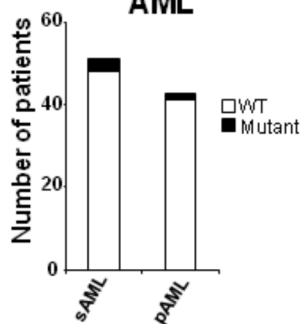**D****Others**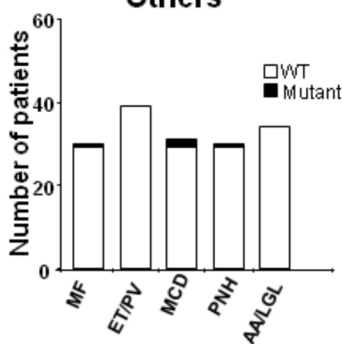**E**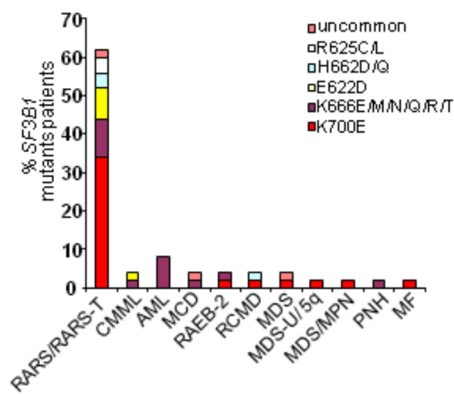

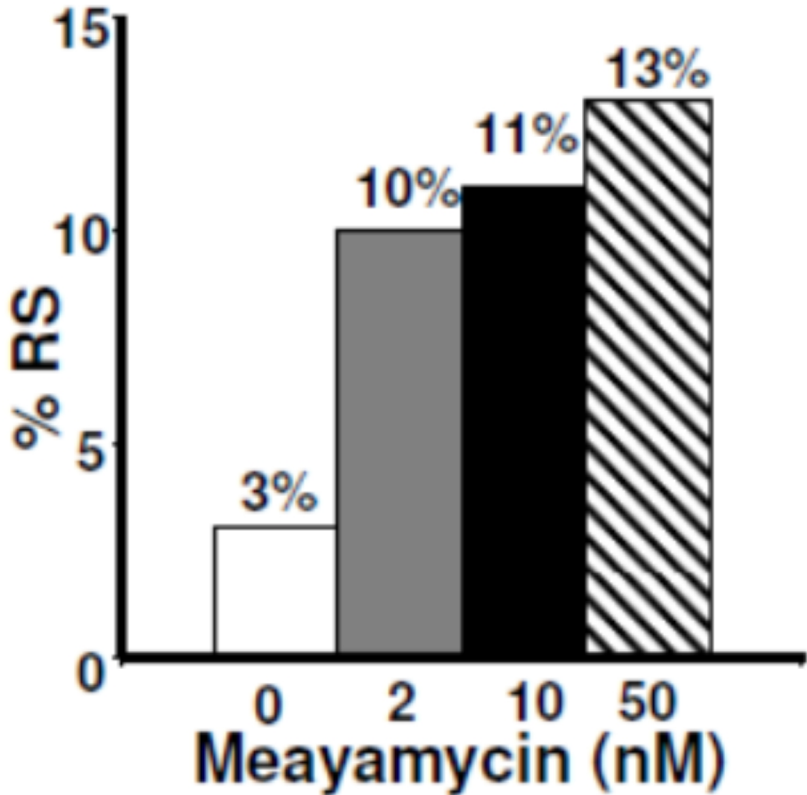

a)

## MDS

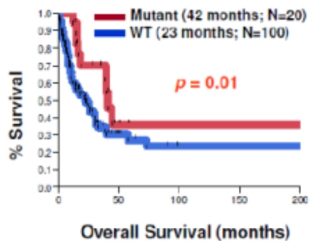

b)

## MDS/MPN

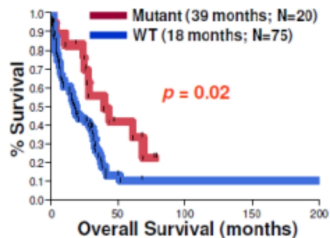

c)

## RARS/RARS-T

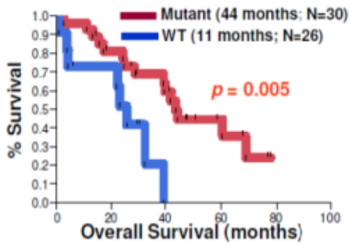

Supplemental Table 1. List of genes showing differential gene expression in SF3B1 mutant versus normal samples

| Gene Name    | Chr | Gene location       | Adjust P-value | BaseM | BaseN | Log2fold(Mutant/Healthy Donor) | P-value  |
|--------------|-----|---------------------|----------------|-------|-------|--------------------------------|----------|
| HBG1         | 11  | 5269502-5271087     | 3.49E-05       | 15068 | 121   | 6.77                           | 1.11E-07 |
| SLC7A5P1     | 16  | 29624424-29625038   | 1.35E-04       | 686   | 4     | 5.69                           | 4.94E-07 |
| PTTG3P       | 8   | 67679634-67680240   | 2.13E-03       | 181   | 0     | 5.17                           | 1.08E-05 |
| FAM57B       | 16  | 30035749-30042186   | 4.40E-03       | 6502  | 0     | 10.10                          | 2.53E-05 |
| LOC100271831 | 16  | 30125433-30125826   | 1.51E-02       | 1679  | 0     | 8.16                           | 1.08E-04 |
| RUNCDC3A     | 17  | 42385927-42396037   | 2.31E-02       | 225   | 4     | 4.02                           | 1.90E-04 |
| FLJ42393     | 3   | 187896331-187898596 | 2.42E-02       | 448   | 0     | 6.32                           | 2.03E-04 |
| GDPD3        | 16  | 30116132-30124878   | 4.06E-02       | 94    | 0     | 4.27                           | 3.79E-04 |
| DEFA4        | 8   | 6793345-6795786     | 5.50E-19       | 6     | 24454 | -10.56                         | 4.28E-23 |
| PRG3         | 11  | 57144243-57148623   | 6.33E-17       | 1     | 5799  | -9.50                          | 9.84E-21 |
| EPX          | 17  | 56270089-56282534   | 2.14E-14       | 4     | 4592  | -8.50                          | 5.00E-18 |
| RNASE3       | 16  | 21359562-21360506   | 1.09E-13       | 6     | 5527  | -8.51                          | 3.38E-17 |
| CORO1A       | 14  | 30194926-30200396   | 9.20E-13       | 2     | 1986  | -7.48                          | 4.06E-16 |
| PRG2         | 11  | 57154835-57158130   | 9.20E-13       | 97    | 43622 | -9.31                          | 4.29E-16 |
| CEACAM6      | 19  | 42259398-42276113   | 1.02E-12       | 8     | 4279  | -7.88                          | 6.37E-16 |
| ELANE        | 19  | 852291-856244       | 1.02E-12       | 167   | 71946 | -9.65                          | 5.89E-16 |
| DEFA3        | 8   | 6873395-6875816     | 2.16E-12       | 4     | 2404  | -7.57                          | 1.51E-15 |
| PPP4C        | 16  | 30087384-30096688   | 6.24E-12       | 2     | 1372  | -7.31                          | 4.85E-15 |
| CAMP         | 3   | 48264862-48266975   | 2.29E-11       | 41    | 10636 | -7.59                          | 1.96E-14 |
| LTF          | 3   | 46477497-46506395   | 6.03E-11       | 405   | 93610 | -8.38                          | 5.62E-14 |
| CTSG         | 14  | 25042725-25045466   | 7.22E-11       | 37    | 9227  | -7.86                          | 7.29E-14 |
| RNASE2       | 14  | 21423630-21424594   | 4.53E-10       | 62    | 10796 | -7.22                          | 4.93E-13 |
| TCN1         | 11  | 59620281-59634041   | 6.73E-10       | 3     | 985   | -6.37                          | 7.85E-13 |
| PRTN3        | 19  | 840985-848175       | 7.21E-10       | 247   | 41679 | -8.62                          | 8.97E-13 |
| AZU1         | 19  | 827831-832017       | 9.44E-10       | 68    | 11331 | -7.70                          | 1.25E-12 |
| BPI          | 20  | 36932552-36965905   | 1.75E-09       | 37    | 5356  | -6.75                          | 2.45E-12 |
| OLR1         | 12  | 10310899-10324790   | 1.09E-08       | 3     | 724   | -5.93                          | 1.61E-11 |
| CLC          | 19  | 40221896-40228668   | 1.12E-08       | 21    | 2835  | -6.65                          | 1.74E-11 |
| SGK3         | 8   | 67624891-67774255   | 6.05E-08       | 0     | 335   | -6.02                          | 9.88E-11 |
| SLPI         | 20  | 43880879-43883206   | 7.85E-08       | 3     | 670   | -5.71                          | 1.34E-10 |
| MMP8         | 11  | 102582526-102595685 | 1.33E-07       | 67    | 5691  | -6.64                          | 2.38E-10 |
| LCN2         | 9   | 130911732-130915734 | 1.82E-07       | 45    | 3174  | -5.77                          | 3.38E-10 |
| MMP9         | 20  | 44637547-44645199   | 2.09E-07       | 27    | 2196  | -5.79                          | 4.06E-10 |
| CEACAM8      | 19  | 43084395-43099082   | 2.12E-07       | 50    | 3734  | -5.90                          | 4.29E-10 |
| MS4A3        | 11  | 59824101-59838587   | 6.24E-07       | 20    | 1717  | -6.65                          | 1.31E-09 |
| CRISP3       | 6   | 49695092-49712056   | 1.11E-06       | 28    | 1944  | -5.83                          | 2.41E-09 |
| C16orf54     | 16  | 29753786-29757340   | 1.46E-06       | 0     | 240   | -5.56                          | 3.29E-09 |
| IL8          | 4   | 74606275-74609431   | 1.71E-06       | 385   | 19694 | -5.80                          | 3.98E-09 |
| S100P        | 4   | 6695566-6698896     | 1.86E-06       | 14    | 941   | -5.21                          | 4.49E-09 |
| MPO          | 17  | 56347217-56358296   | 3.12E-06       | 1607  | 81048 | -7.58                          | 7.76E-09 |
| SRGN         | 10  | 70847828-70864565   | 6.54E-06       | 2673  | 92897 | -5.17                          | 1.68E-08 |
| TMEM176B     | 7   | 150488378-150497621 | 8.17E-06       | 17    | 822   | -5.06                          | 2.16E-08 |

|            |    |                     |          |       |        |       |          |
|------------|----|---------------------|----------|-------|--------|-------|----------|
| PGLYRP1    | 19 | 46522412-46526556   | 1.02E-05 | 6     | 489    | -4.88 | 2.87E-08 |
| SDCX       | 8  | 97505882-97624037   | 1.02E-05 | 1     | 230    | -5.08 | 2.83E-08 |
| ALOX15     | 17 | 4534221-4544960     | 1.47E-05 | 2     | 275    | -5.06 | 4.24E-08 |
| HP         | 16 | 72088508-72094957   | 2.14E-05 | 26    | 1169   | -4.98 | 6.31E-08 |
| CCL7       | 17 | 32597240-32599255   | 2.90E-05 | 0     | 172    | -5.11 | 9.02E-08 |
| S100A8     | 1  | 153362509-153363549 | 2.90E-05 | 8552  | 243742 | -4.85 | 8.80E-08 |
| TXNIP      | 1  | 145438462-145442626 | 3.97E-05 | 192   | 6874   | -6.79 | 1.29E-07 |
| S100A12    | 1  | 153346184-153348075 | 5.51E-05 | 607   | 15905  | -4.69 | 1.84E-07 |
| LYZ        | 12 | 69742134-69748013   | 8.78E-05 | 36753 | 854523 | -4.60 | 3.00E-07 |
| LPP        | 3  | 187930721-188608459 | 1.20E-04 | 5     | 316    | -4.45 | 4.20E-07 |
| IL1R2      | 2  | 102608306-102644880 | 1.22E-04 | 10    | 525    | -4.80 | 4.36E-07 |
| B3GNT5     | 3  | 182971032-182991178 | 1.52E-04 | 69    | 1976   | -4.65 | 5.67E-07 |
| FCGR3B     | 1  | 161592990-161601158 | 1.66E-04 | 42    | 999    | -4.74 | 6.30E-07 |
| S100A9     | 1  | 153330330-153333502 | 1.79E-04 | 3901  | 79729  | -4.43 | 6.96E-07 |
| OLFM4      | 13 | 53602972-53626186   | 2.18E-04 | 12    | 519    | -4.51 | 8.65E-07 |
| CHI3L1     | 1  | 203148059-203155922 | 3.82E-04 | 24    | 812    | -5.49 | 1.55E-06 |
| FCAR       | 19 | 55385549-55401839   | 6.02E-04 | 116   | 2410   | -4.21 | 2.48E-06 |
| CD24       | Y  | 21152526-21154705   | 7.14E-04 | 62    | 1409   | -4.25 | 2.99E-06 |
| PLAU       | 10 | 75670862-75677256   | 7.79E-04 | 11    | 399    | -4.17 | 3.33E-06 |
| ALPL       | 1  | 21835858-21904904   | 1.11E-03 | 2     | 178    | -4.52 | 4.82E-06 |
| CHIT1      | 1  | 203185207-203198860 | 1.29E-03 | 6     | 286    | -4.34 | 5.73E-06 |
| NCRNA00152 | 2  | 87754974-87821028   | 1.33E-03 | 0     | 108    | -4.51 | 5.99E-06 |
| MGAM       | 7  | 141695679-141806546 | 1.35E-03 | 18    | 466    | -3.97 | 6.18E-06 |
| ANXA3      | 4  | 79472742-79531602   | 1.37E-03 | 72    | 1463   | -4.18 | 6.44E-06 |
| GPR97      | 16 | 57702157-57723288   | 1.37E-03 | 46    | 1045   | -4.39 | 6.49E-06 |
| TNFRSF12A  | 16 | 3070313-3072381     | 1.43E-03 | 19    | 450    | -3.96 | 6.90E-06 |
| IL1RL1     | 2  | 102953717-102961180 | 1.77E-03 | 0     | 123    | -4.33 | 8.67E-06 |
| TMEM176A   | 7  | 150497854-150502208 | 1.82E-03 | 2     | 152    | -4.26 | 9.06E-06 |
| EMP1       | 12 | 13349602-13369707   | 2.22E-03 | 21    | 487    | -3.89 | 1.14E-05 |
| MAP3K8     | 10 | 30722866-30750761   | 2.33E-03 | 147   | 2166   | -3.82 | 1.22E-05 |
| CD177      | 19 | 43857825-43867479   | 2.53E-03 | 8     | 284    | -4.12 | 1.34E-05 |
| ALOX5AP    | 13 | 31309669-31338556   | 2.69E-03 | 345   | 5130   | -3.83 | 1.44E-05 |
| PLAUR      | 19 | 44152732-44174502   | 3.10E-03 | 688   | 9914   | -3.83 | 1.69E-05 |
| MME        | 3  | 154797436-154901518 | 3.35E-03 | 8     | 263    | -3.87 | 1.85E-05 |
| HDC        | 15 | 50534148-50557926   | 3.79E-03 | 4     | 199    | -4.41 | 2.12E-05 |
| CA4        | 17 | 58227302-58236904   | 4.40E-03 | 0     | 90     | -4.28 | 2.53E-05 |
| IFNGR1     | 6  | 137518621-137540567 | 4.54E-03 | 586   | 7212   | -3.65 | 2.64E-05 |
| NAMPT      | 7  | 105888734-105925638 | 5.11E-03 | 1321  | 15379  | -3.64 | 3.02E-05 |
| BCL2A1     | 15 | 80253233-80263643   | 5.60E-03 | 245   | 2727   | -3.85 | 3.35E-05 |
| HBEGF      | 5  | 139712429-139726188 | 6.04E-03 | 40    | 727    | -3.90 | 3.66E-05 |
| TREM1      | 6  | 41243712-41254457   | 6.12E-03 | 60    | 808    | -3.67 | 3.76E-05 |
| CHD1L      | 1  | 146714291-146767441 | 6.89E-03 | 32    | 493    | -3.65 | 4.29E-05 |
| SAMSN1     | 21 | 15857549-15918664   | 7.08E-03 | 289   | 3314   | -3.55 | 4.46E-05 |
| RETN       | 19 | 7733972-7735340     | 7.14E-03 | 19    | 403    | -3.73 | 4.55E-05 |
| ANPEP      | 15 | 90328127-90358072   | 7.51E-03 | 227   | 2963   | -3.64 | 4.85E-05 |

|           |    |                     |          |      |       |       |          |
|-----------|----|---------------------|----------|------|-------|-------|----------|
| THBD      | 20 | 23026271-23030301   | 7.65E-03 | 10   | 273   | -3.74 | 4.99E-05 |
| MAPK3     | 16 | 30125427-30134630   | 8.36E-03 | 0    | 97    | -4.03 | 5.52E-05 |
| ANXA1     | 9  | 75766781-75785307   | 8.40E-03 | 2803 | 31070 | -3.48 | 5.61E-05 |
| PCOLCE2   | 3  | 142536712-142607934 | 9.57E-03 | 0    | 79    | -4.12 | 6.47E-05 |
| LRG1      | 19 | 4537228-4540036     | 1.04E-02 | 24   | 413   | -3.52 | 7.14E-05 |
| IL1RAP    | 3  | 190231840-190348071 | 1.16E-02 | 19   | 341   | -3.49 | 8.02E-05 |
| SPN       | 16 | 29674580-29681821   | 1.24E-02 | 40   | 612   | -3.58 | 8.70E-05 |
| OSM       | 22 | 30658821-30662840   | 1.29E-02 | 80   | 1134  | -3.85 | 9.11E-05 |
| C19orf59  | 19 | 7741943-7744719     | 1.61E-02 | 123  | 1360  | -3.33 | 1.17E-04 |
| SERPINE1  | 7  | 100770379-100782546 | 1.61E-02 | 21   | 308   | -3.57 | 1.18E-04 |
| ALDOA     | 16 | 30077044-30081734   | 1.64E-02 | 1002 | 10163 | -3.32 | 1.24E-04 |
| CXCR1     | 2  | 219027570-219031716 | 1.64E-02 | 25   | 362   | -3.41 | 1.25E-04 |
| FCN1      | 9  | 137801436-137809806 | 1.64E-02 | 5124 | 47277 | -3.32 | 1.23E-04 |
| ORM1      | 9  | 117085303-117088757 | 1.64E-02 | 3    | 134   | -3.57 | 1.25E-04 |
| FPR2      | 19 | 52264453-52273777   | 1.70E-02 | 80   | 945   | -3.33 | 1.31E-04 |
| QPCT      | 2  | 37571753-37600464   | 1.72E-02 | 225  | 2119  | -3.37 | 1.33E-04 |
| IL1RN     | 2  | 113885138-113891592 | 1.74E-02 | 91   | 919   | -3.42 | 1.37E-04 |
| HIF1A     | 14 | 62162119-62214977   | 1.94E-02 | 901  | 8757  | -3.26 | 1.54E-04 |
| TMCC3     | 12 | 94960900-95044324   | 2.04E-02 | 35   | 419   | -3.45 | 1.63E-04 |
| CLESL1    | 4  | 185676749-185747215 | 2.04E-02 | 307  | 2990  | -3.24 | 1.65E-04 |
| CLEC5A    | 7  | 141627157-141646783 | 2.09E-02 | 20   | 321   | -3.36 | 1.70E-04 |
| SLC2A5    | 1  | 9097007-9129887     | 2.38E-02 | 3    | 140   | -3.99 | 1.98E-04 |
| SLC2A3    | 12 | 8071825-8088892     | 2.49E-02 | 1612 | 15486 | -3.26 | 2.11E-04 |
| ANGPTL4   | 19 | 8429011-8439257     | 2.69E-02 | 0    | 66    | -3.90 | 2.30E-04 |
| MXD1      | 2  | 70142203-70170074   | 2.93E-02 | 523  | 4746  | -3.15 | 2.54E-04 |
| NLRP3     | 1  | 247581351-247612404 | 2.93E-02 | 203  | 1914  | -3.15 | 2.58E-04 |
| RBM8A     | 1  | 145507638-145511444 | 2.93E-02 | 84   | 1055  | -4.26 | 2.60E-04 |
| SAT1      | X  | 23801275-23804325   | 2.93E-02 | 3346 | 26184 | -3.24 | 2.56E-04 |
| DNTT      | 10 | 98064085-98098319   | 3.44E-02 | 7    | 178   | -4.04 | 3.09E-04 |
| NUCB2     | 11 | 17298286-17353069   | 3.44E-02 | 474  | 4708  | -3.44 | 3.10E-04 |
| VSTM1     | 19 | 54544085-54567207   | 3.68E-02 | 12   | 233   | -3.53 | 3.35E-04 |
| PHACTR1   | 6  | 12717833-13287528   | 4.00E-02 | 3    | 107   | -3.34 | 3.67E-04 |
| PADI4     | 1  | 17634690-17690495   | 4.02E-02 | 267  | 2607  | -3.34 | 3.72E-04 |
| NR4A1     | 12 | 52445191-52453285   | 4.22E-02 | 85   | 820   | -3.07 | 3.97E-04 |
| SERPINB10 | 18 | 61582745-61602474   | 4.23E-02 | 34   | 448   | -3.50 | 4.01E-04 |
| COL17A1   | 10 | 105791048-105845638 | 4.35E-02 | 5    | 154   | -3.94 | 4.16E-04 |
| CCL2      | 17 | 32582296-32584218   | 4.36E-02 | 6    | 141   | -3.26 | 4.23E-04 |
| CD93      | 20 | 23059994-23066977   | 4.36E-02 | 179  | 1456  | -3.05 | 4.27E-04 |
| CXCL16    | 17 | 4636830-4643223     | 4.36E-02 | 289  | 2143  | -3.20 | 4.28E-04 |
| DEFA5     | 8  | 6912829-6914259     | 4.36E-02 | 0    | 60    | -3.78 | 4.31E-04 |
| RLPL2     | 12 | 123899936-123921264 | 4.36E-02 | 281  | 2174  | -3.06 | 4.33E-04 |
| ARG1      | 6  | 131894365-131905468 | 4.67E-02 | 113  | 1060  | -3.08 | 4.68E-04 |
| CXCL12    | 10 | 44865607-44880545   | 4.72E-02 | 6    | 161   | -3.54 | 4.77E-04 |
